# Supplementary material for: Atomic-level coupled spinel@perovskite dual-phase oxides toward enhanced performance in Zn–air batteries
Source: Royal Society of Chemistry journal article supplement (doi:10.1039/d1ta09457b), 2021-12-10
Supplement: d1ta09457b1.pdf [file d1ta09457b1.pdf]

## Supporting Information

### **Atomic-level Coupled Spinel@perovskite Dual-phase Oxides toward Enhanced Performance in Zn-air Batteries**

Jiaqi Ran<sup>a</sup>, Jian-Feng Wu<sup>b</sup>, Yongfeng Hu<sup>c</sup>, Mohsen Shakouri<sup>c</sup>, Baorui Xia<sup>\*a</sup>, Daqiang Gao<sup>a</sup>.

<sup>a</sup>Key Laboratory for Magnetism and Magnetic Materials of MOE, Key Laboratory of Special Function Materials and Structure Design of MOE, Lanzhou University, Lanzhou 730000, P. R. China

<sup>b</sup>State Key Laboratory of Applied Organic Chemistry; Key Laboratory of Nonferrous Metals Chemistry and Resources Utilization of Gansu Province; Advanced Catalysis Center; College of Chemistry and Chemical Engineering; Lanzhou University, Lanzhou 730000, People's Republic of China

<sup>c</sup>Canadian Light Source Inc. University of Saskatchewan; Saskatoon; Saskatchewan, S7N2V3, Canada

**Liquid Zn-Air Battery Assembly:** Conventional Zn-air battery fabricated by Zn plate (anode), 6 M KOH with a 0.2 M zinc acetate (electrolyte solution) and the prepared electrocatalyst ink is dropped onto a carbon fiber paper (air cathode) with a loading amount of 2.0 mg/cm<sup>2</sup>.

**Solid-type Zn-air battery assembly:** the Zn foil (anode) and the carbon fiber paper with catalyst ink (air cathode) inserted into the manufactured PVA glue (electrolyte). The PVA glue fabricated as follows: PVA powder (2 g) was dissolved into distilled water (20 mL) under magnetic stirring for about 2 h (95 °C). Subsequently, 18M KOH solution (2 mL) was added into transparent gel and kept stirring for about 40min (95 °C) Then, the cooled PVA gule transferred to centrifugal tube and the tube was kept in a refrigerator for 8 h. Eventually, the glue is deforsted and ready for electrolyte.

**Material characterizations:** The XRD patterns were recored on a Philips/X, Pert PRO diffractometer with Cu K $\alpha$  radiation. The EELS (Apreo S) and XPS (Kratos AXIS Ultra, corrected with C1s line at 284.6 eV) could be employed to analyses the elementary composition of the samples and the bonding characteristics. The SEM and

TEM images of catalysts were collected using Apreo S and Tecnai G2 F30, FEI, respectively. The HRTEM images were obtained by Themis Titan G2 80-300. ESR measurements were performed on a Bruker ER 200D spectrometer at room temperature.

### ***Calculation details***

The number of electron transfer per O<sub>2</sub> participate in oxygen reduction can be determined by Koutechy-Levich equation: <sup>[1, 2]</sup>

$$1/j = 1/j_k + 1/(B\omega^{1/2}) \quad (1)$$

Where  $j$  is the measured current on RDE,  $j_k$  is the dynamic current density, and  $\omega$  is the angular velocity of the disk.  $B$  is the slope of the Koutechy-Levich (K-L) plots calculated by the Levich equation below:

$$B = 0.2nF(D_{O_2})^{2/3}\nu^{-1/6}C_{O_2} \quad (2)$$

Where  $n$  stand for the number of transferred electrons per oxygen molecule.  $F$  stand for Faraday constant ( $F = 96485$  C/mol).  $D_{O_2}$  stand for the diffusion coefficient of Oxygen in 0.1 M KOH ( $D_{O_2} = 1.9 \times 10^{-5}$  cm<sup>2</sup>/s).  $\nu$  stand for the motion viscosity ( $\nu = 0.01$  cm<sup>2</sup>/s) in the electrolyte solution.  $C_{O_2}$  stand for the bulk concentration of O<sub>2</sub> ( $C_{O_2} = 1.2 \times 10^{-6}$  mol/cm<sup>3</sup>).

The specific capacity was calculated by the equation below: <sup>[3]</sup>

$$\eta = a + b \times \log j \quad (3)$$

Where  $\eta$  stand for the overpotential,  $b$  stands for the Tafel slope,  $j$  stands for the current density.

The calculation of overpotential for OER: [4]

$$\eta = E_{RHE} - 1.23 \quad (4)$$

Calculated electrochemical active surface area

$$A_{ECSA}^{LaCoO_3} = \frac{6.4 \times 1000 \mu F cm^{-2}}{40 \mu F cm^{-2} per cm_{ECSA}^2} = 160 cm_{ECSA}^2 \quad (5)$$

$$A_{ECSA}^{Co_3O_4@LaCoO_3} = \frac{10.5 \times 1000 \mu F cm^{-2}}{40 \mu F cm^{-2} per cm_{ECSA}^2} = 262.5 cm_{ECSA}^2 \quad (6)$$

$$A_{ECSA}^{Co_3O_4} = \frac{8.5 \times 1000 \mu F cm^{-2}}{40 \mu F cm^{-2} per cm_{ECSA}^2} = 212.5 cm_{ECSA}^2 \quad (7)$$

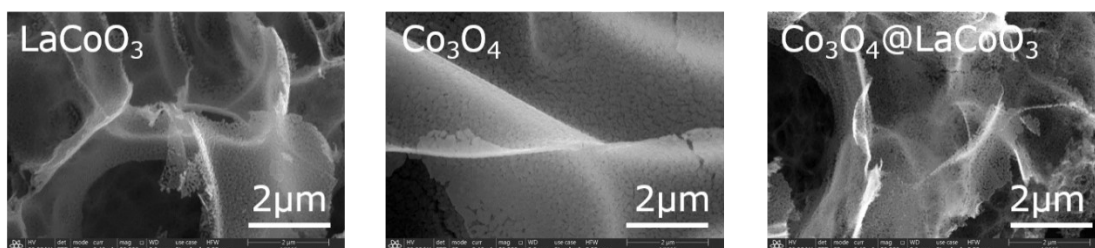

**Fig. S1** The scanning electron microscopy (SEM) images of LaCoO<sub>3</sub>, Co<sub>3</sub>O<sub>4</sub> and Co<sub>3</sub>O<sub>4</sub>@LaCoO<sub>3</sub>.

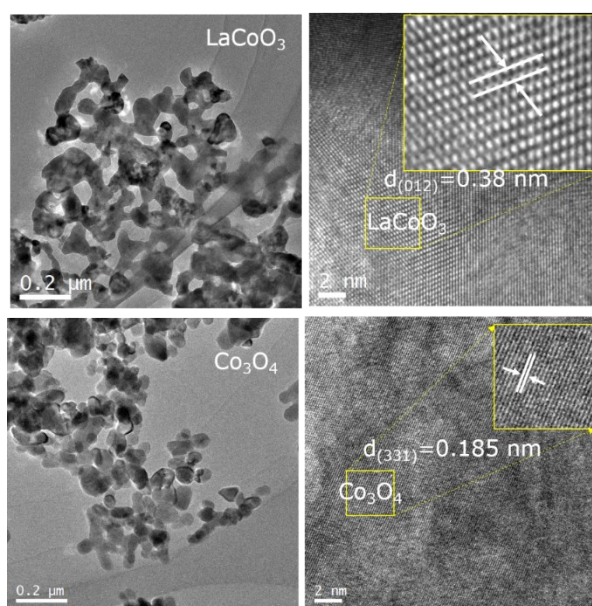

**Fig. S2** The TEM and HRTEM images of LaCoO<sub>3</sub> and Co<sub>3</sub>O<sub>4</sub>.

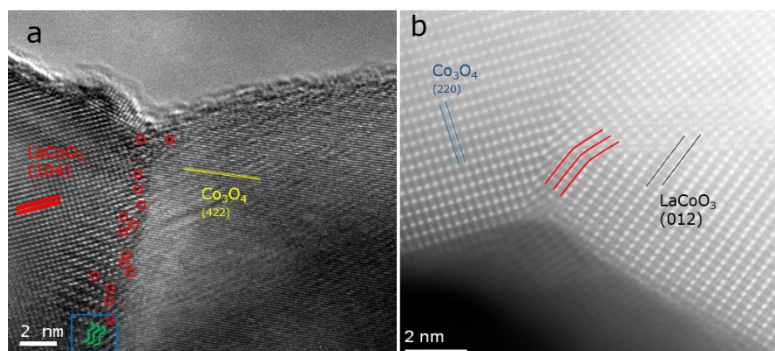

Fig. S3 (a) The HRTEM images and (b) HAADF-STEM image of  $\text{Co}_3\text{O}_4@\text{LaCoO}_3$

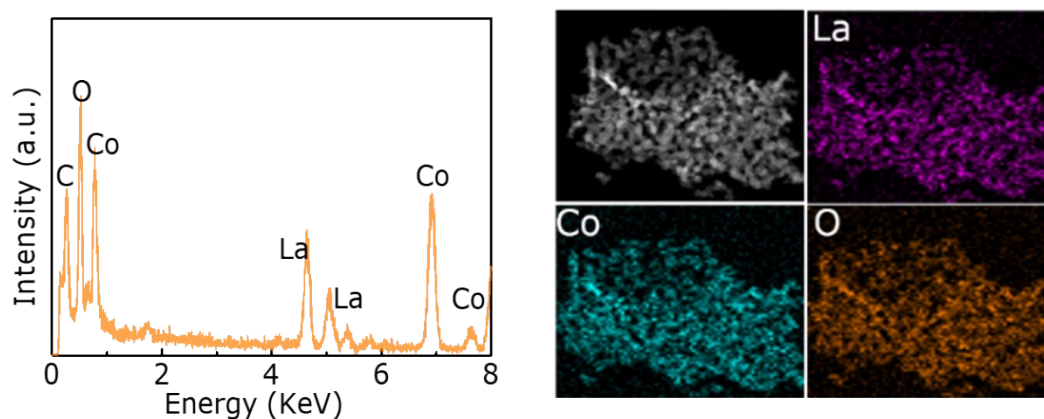

Fig. S4 The HAADF-STEM image and EDS mapping of  $\text{Co}_3\text{O}_4@\text{LaCoO}_3$ .

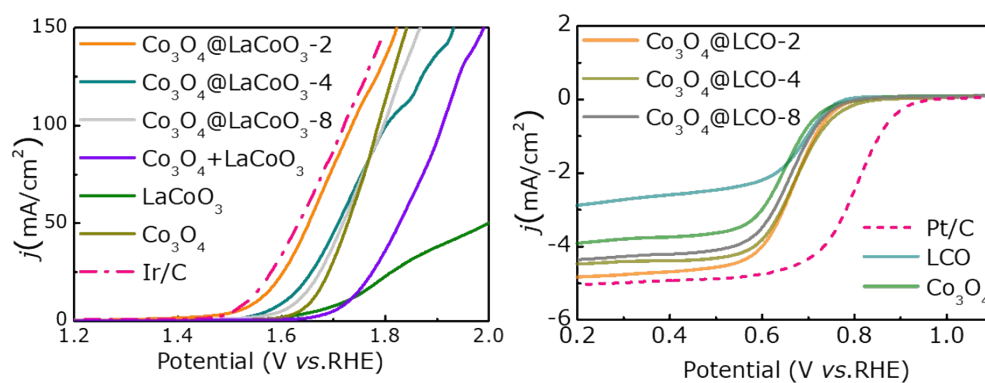

Fig. S5 The OER and ORR polarization curves of all samples.

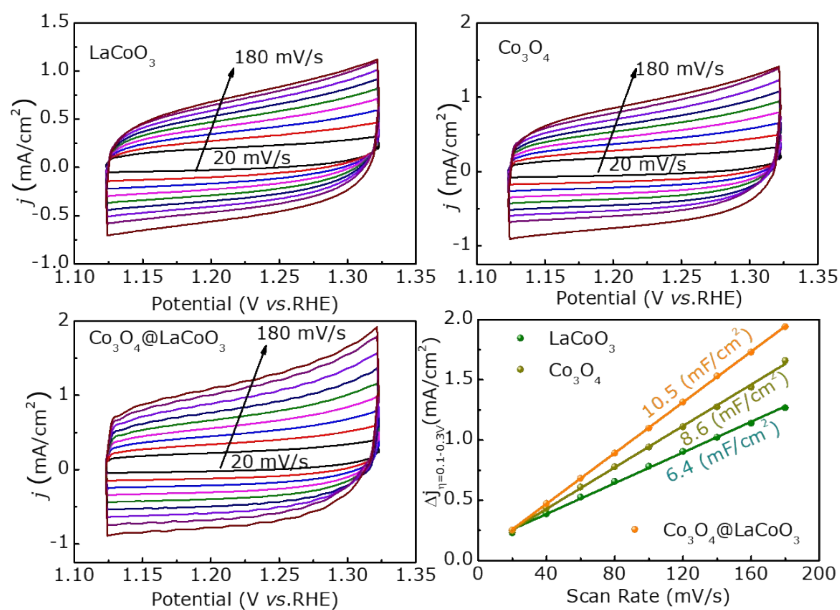

**Fig. S6** The cyclic voltammetry curves and the calculated  $C_{dl}$  in 1M KOH.

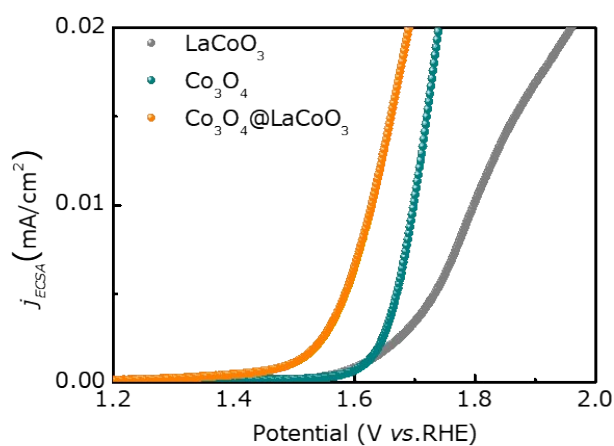

**Fig. S7** Polarization curves normalized based on their ECSA.

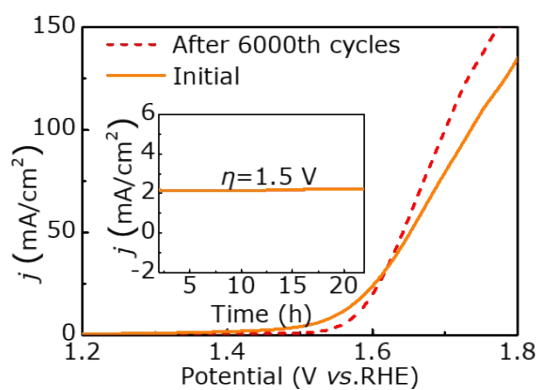

**Fig. S8** Curves of  $\text{Co}_3\text{O}_4@LaCoO_3$  after (red line) 6000<sup>th</sup> cycles and initial (orange line). The inset is the long-term stability test at 1.5 V (versus RHE) for  $\text{Co}_3\text{O}_4@LaCoO_3$ .

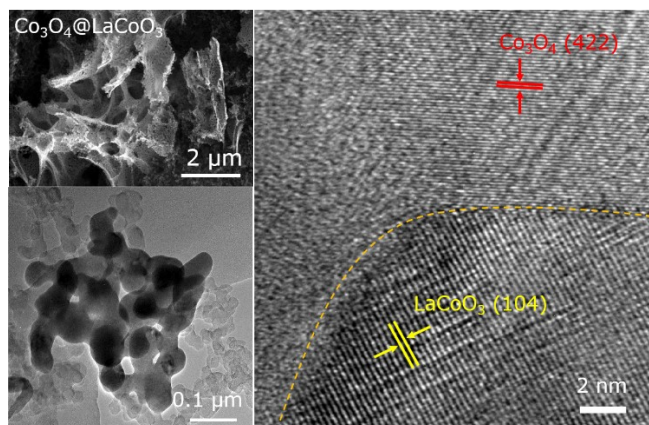

**Fig. S9** The SEM, TEM and HRTEM images of  $\text{Co}_3\text{O}_4@\text{LaCoO}_3$  after OER stability test.

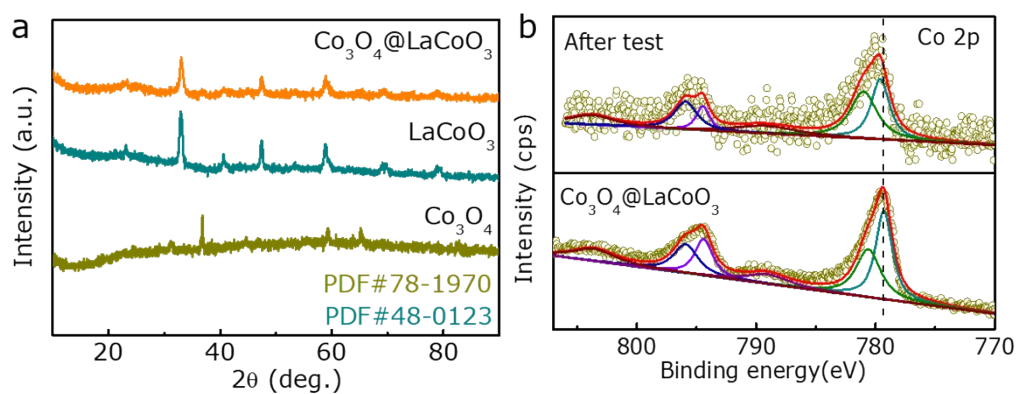

**Fig. S10** (a) The XRD patterns and (b) Co 2p XPS spectrum of  $\text{Co}_3\text{O}_4@\text{LaCoO}_3$  after OER stability test.

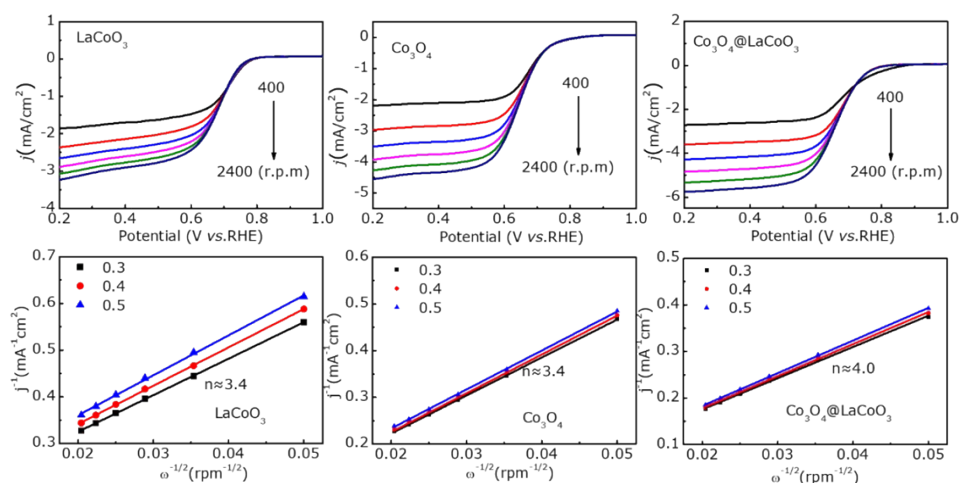

**Fig. S11** Different rotating speeds from 400 to 2400 rpm for ORR polarization curves and K-L plots of  $\text{LaCoO}_3$ ,  $\text{Co}_3\text{O}_4$  and  $\text{Co}_3\text{O}_4@\text{LaCoO}_3$ .

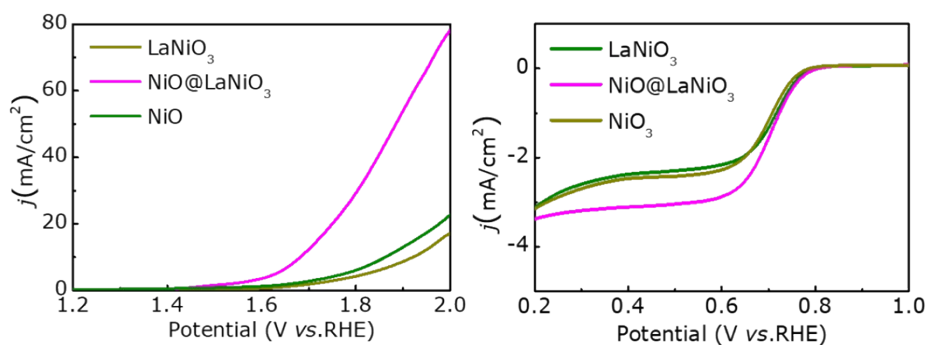

**Fig. S12** The OER and ORR polarization curves of  $\text{LaNiO}_3$ ,  $\text{NiO@LaNiO}_3$ ,  $\text{NiO}$ .

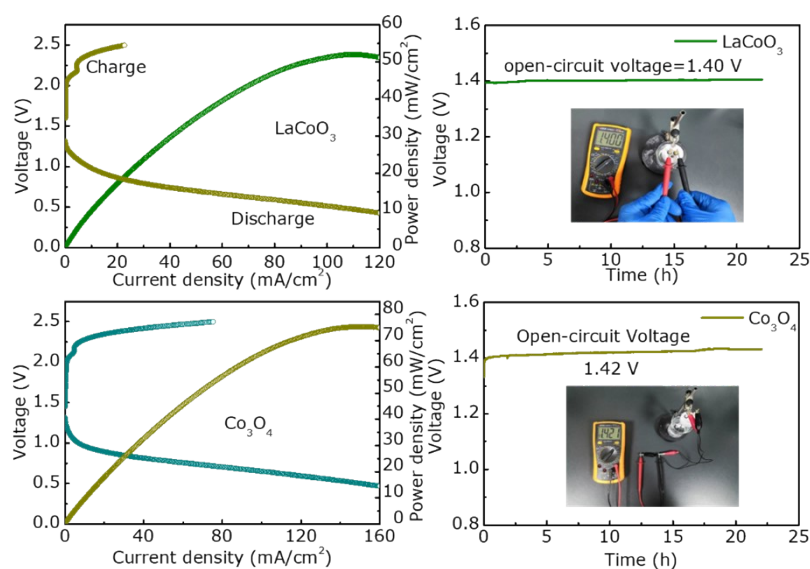

**Fig. S13** The power density curve and the open-circuit voltage of  $\text{LaCoO}_3$  and  $\text{Co}_3\text{O}_4$ .

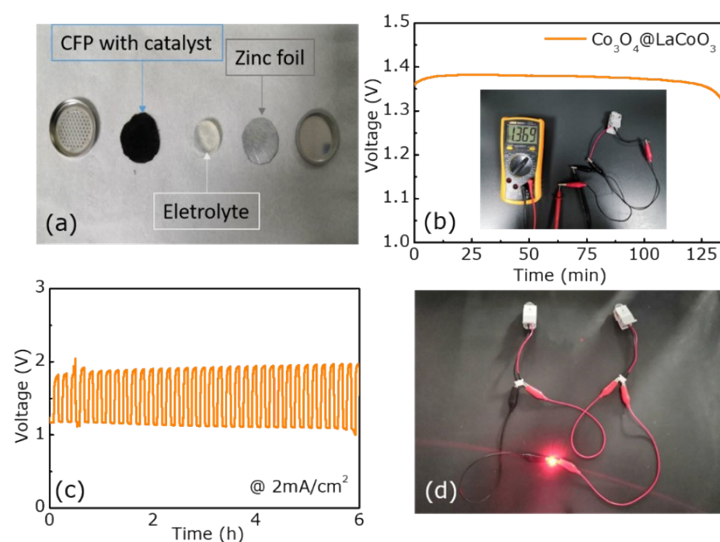

**Fig. S14** (a) Structure diagram of solid-button Zn–air battery. (b) The open-circuit curve of the solid-button Zn–air battery. (c) The curves of discharge/charge cycles of the solid-button Zn–air battery under  $2 \text{ mA/cm}^2$ . (d) The red LEDs powered by two solid-button Zn–air batteries.

**Table S1.** Comparison of the electrocatalytic activities of  $\text{Co}_3\text{O}_4@\text{LaCoO}_3$  with some representative Co-based OER electrocatalysts reported in 1.0 M KOH solution.

| catalysts                                        | $E_{j=10 \text{ mA/cm}^2}$ (mV) | Ref.      |
|--------------------------------------------------|---------------------------------|-----------|
| $\text{Co}_3\text{O}_4@\text{LaCoO}_3$           | 320                             | This work |
| $\text{LaCoO}_3$                                 | 490                             | This work |
| $\text{Co}_3\text{O}_4$                          | 430                             | This work |
| $\text{Co}_9\text{S}_8@\text{MoS}_2$             | 342                             | [5]       |
| $\text{Co}@\text{Co}_3\text{O}_4\text{-Gr}$      | 430                             | [6]       |
| $\text{CoS-Co(OH)}_2@\text{MoS}_{2+x}\text{-NF}$ | 380                             | [7]       |
| $\text{CoNC}@\text{MoS}_2/\text{CNF}$            | 350                             | [8]       |
| $\text{CoO/Mn}_3\text{O}_4$                      | 455                             | [9]       |
| $\text{MnO/PAC}$                                 | 421                             | [10]      |

**Table S2.** Performances of recently reported liquid Zn-air batteries.

| Catalysts                                                   | Power density (mW/cm <sup>2</sup> ) | Specific capacity (mAh/g <sub>Zn</sub> ) | Ref.      |
|-------------------------------------------------------------|-------------------------------------|------------------------------------------|-----------|
| $\text{Co}_3\text{O}_4@\text{LaCoO}_3$                      | 140                                 | 785                                      | This work |
| $\text{Fe}_{0.5}\text{Co}_{0.5}\text{O}_x/\text{NrGO}$      | 86                                  | 756                                      | [11]      |
| $\text{NiCo}_2\text{S}_4@\text{g-C}_3\text{N}_4\text{-CNT}$ | 142                                 | 485.7                                    | [12]      |
| $\text{Co}_3\text{FeS}_{1.5}(\text{OH})_6$                  | 113                                 | 843                                      | [13]      |
| $\text{NiO/CoN PINWs}$                                      | 80                                  | 690                                      | [14]      |
| $\text{Pt/C}  \text{RuO}_2$                                 | 150                                 | 768                                      | [10]      |



## References

- (1) Y. Fu, H. Y. Yu, C. Jiang, T. H. Zhang, R. Zhan, X. W. Li, J. F. Li, J. H. Tian and R. Z. Yang, *Adv. Funct. Mater.* 2018, **28**, 1705094.
- (2) L. Ma, S. Chen, Z. Pei, Y. Huang, G. Liang, F. Mo, Q. Yang, J. Su, Y. H. Gao, J. Zapien, and C. Zhi, *ACS Nano* 2018, **12**, 1949.
- (3) A. C. Thenuwara, E. B. Cerkez, S. L. Shumlas, N. H. Attanayake, I. G. McKendry, L. Frazer, E. Borguet, Q. Kang, R. C. Remsing and M. L. Klein, *Angew. Chem. Int. Ed.* 2016, **55**, 10381.
- (4) P. Liu, J. Ran, B. Xia, S. Xi, D. Gao and J. Wang, *Nano-Micro Lett.* 2020, **12**, 68.
- (5) J. Bai, T. Meng, D. Guo, S. Wang, B. Mao and M. Cao, *ACS Appl. Mater. Interfaces* 2018, **10**, 1678–1689.
- (6) M. M. Islam, S. N. Faisal, T. Akhter, A. K. Roy, A. I. Minett, K. Konstantinov and S. X. Dou, *Part. Part. Syst. Character.* 2017, **34**, 1600386.
- (7) T. Yoon and K. S. Kim, *Adv. Funct. Mater.* 2016, **26**, 7386-7393.
- (8) D. Ji, S. Peng, L. Fan, L. Li, X. Qin and S. Ramakrishna, *J. Mater. Chem. A* 2017, **5**, 23898-23908.
- (9) C. Guo, Y. Zheng, J. Ran, F. Xie, M. Jaroniec and S. Z. Qiao, *Angew. Chem. Int. Ed.* 2017, **56**, 8539.
- (10) X. F. Lu, Y. Chen, S. Wang, S. Gao and X. W. Lou (David), *Adv. Mater.* 2019, **31**, 1902339.
- (11) L. Wei, H. E. Karahan, S. L. Zhai, H. W. Liu, X. C. Chen, Z. Zhou, Y. J. Lei, Z. W. Liu and Y. Chen, *Adv. Mater.* 2017, **29**, 1701410.
- (12) X. Han, W. Zhang, X. Ma, C. Zhong, N. Zhao, W. Hu and Y. Deng, *Adv. Mater.* 2019, **31**, 1808281.
- (13) H. F. Wang, C. Tang, B. Wang, B. Q. Li and Q. Zhang, *Adv. Mater.* 2017, **29**, 1702327.
- (14) J. Yin, Y. X. Li, F. Lv, Q. H. Fan, Y. Q. Zhao, Q. L. Zhang, W. Wang, F. Y. Cheng, P. X. Xi and S. J. Guo, *ACS Nano* 2017, **11**, 2275.
